# Supplementary material for: (Tele)Work and Care during Lockdown: Labour and Socio-Familial Restructuring in Times of COVID-19
Source: MDPI journal article supplement (doi:10.3390/ijerph182212087), 2021-11-17
Supplement: s1 [file s1]

**Table S1.** Three fixed  $2 \times 2 \times 2$  factors (gender  $\times$  care  $\times$  work situation) analysis of variance (ANOVA) in socio-health situation and new work organisation.

|                                | Socio-Health Situation |          |                           |          |              |          | New Work Organisation     |          |                            |          |                        |          |                               |          |
|--------------------------------|------------------------|----------|---------------------------|----------|--------------|----------|---------------------------|----------|----------------------------|----------|------------------------|----------|-------------------------------|----------|
|                                | Fear of Contagion      |          | Perceived Economic Threat |          | Hours Worked |          | Resources for Teleworking |          | Org. Readiness to Telework |          | Safety in On-Site Work |          | Productivity Control Measures |          |
|                                | F (1, 239)             | $\eta^2$ | F (1, 240)                | $\eta^2$ | F (1, 243)   | $\eta^2$ | F (1, 135)                | $\eta^2$ | F (1, 140)                 | $\eta^2$ | F (1, 102)             | $\eta^2$ | F (1, 138)                    | $\eta^2$ |
| Gender                         | 1.129                  | 0.005    | 0.130                     | 0.001    | 1.307        | 0.006    | 0.985                     | 0.007    | 0.393                      | 0.003    | 0.012                  | 0.001    | 1.831                         | 0.013    |
| Care                           | 3.296                  | 0.014    | 3.545                     | 0.015    | 1.169        | 0.005    | 0.350                     | 0.003    | 0.122                      | 0.001    | 1.245                  | 0.013    | 1.483                         | 0.011    |
| Work situation                 | 3.353                  | 0.014    | 2.041                     | 0.009    | 1.386        | 0.006    |                           |          |                            |          |                        |          |                               |          |
| Gender * Care                  | 0.302                  | 0.001    | 1.347                     | 0.006    | 0.021        | 0.000    | 0.008                     | 0.001    | 0.004                      | 0.001    | 1.215                  | 0.12     | 0.452                         | 0.003    |
| Gender * Work situation        | 1.882                  | 0.008    | 0.038                     | 0.001    | 1.400        | 0.006    |                           |          |                            |          |                        |          |                               |          |
| Care * Work situation          | 0.051                  | 0.001    | 0.010                     | 0.001    | 0.625        | 0.003    |                           |          |                            |          |                        |          |                               |          |
| Gender * Care * Work situation | 4.102 *                | 0.017    | 0.007                     | 0.001    | 2.557        | 0.011    |                           |          |                            |          |                        |          |                               |          |

Notes. \*  $p < 0.05$ .

**Table S2.** Three fixed  $2 \times 2 \times 2$  factors (gender  $\times$  care  $\times$  work situation) analysis of variance (ANOVA) in conciliation and psychosocial consequences and coping.

|                                | Conciliation         |          |                      |          | Psychosocial Consequences and Coping |          |                      |          |            |          |            |          |
|--------------------------------|----------------------|----------|----------------------|----------|--------------------------------------|----------|----------------------|----------|------------|----------|------------|----------|
|                                | Work-Family Conflict |          | Family-Work Conflict |          | Negative Workaholism                 |          | Positive Workaholism |          | Coping     |          | Job Stress |          |
|                                | F (1, 240)           | $\eta^2$ | F (1, 236)           | $\eta^2$ | F (1, 238)                           | $\eta^2$ | F (1, 241)           | $\eta^2$ | F (1, 239) | $\eta^2$ | F (1, 240) | $\eta^2$ |
| Gender                         | 0.661                | 0.003    | 0.028                | 0.001    | 4.799 *                              | 0.020    | 2.551                | 0.011    | 10.277 **  | 0.043    | 4.986 *    | 0.021    |
| Care                           | 10.845*              | 0.045    | 12.840 **            | 0.053    | 0.040                                | 0.000    | 0.897                | 0.004    | 0.271      | 0.001    | 1.071      | 0.005    |
| Work situation                 | 0.410                | 0.002    | 13.419 **            | 0.056    | 5.729 *                              | 0.024    | 9.171 **             | .038     | 0.610      | 0.003    | 0.682      | 0.003    |
| Gender * Care                  | 0.010                | 0.001    | 1.350                | 0.006    | 0.021                                | 0.000    | 1.398                | 0.006    | 0.036      | 0.001    | 0.071      | 0.000    |
| Gender * Work situation        | 0.080                | 0.001    | 4.319 *              | 0.019    | 0.963                                | 0.004    | 0.431                | 0.002    | 0.300      | 0.001    | 1.626      | 0.007    |
| Care * Work situation          | 0.362                | 0.002    | 0.259                | 0.001    | 2.376                                | 0.010    | 2.226                | 0.009    | 0.329      | 0.001    | 0.924      | 0.004    |
| Gender * Care * Work situation | 1.992                | 0.009    | 1.775                | 0.008    | 0.929                                | 0.004    | 0.939                | 0.004    | 0.843      | 0.004    | 0.755      | 0.003    |

Notes. \*  $p < 0.05$ . \*\*  $p < 0.01$ .
